# Supplementary material
Source: MDPI journal article supplement (https://www.mdpi.com/2073-4395/9/2/64)
Supplement: s1 [file s1]

## Supplementary figures

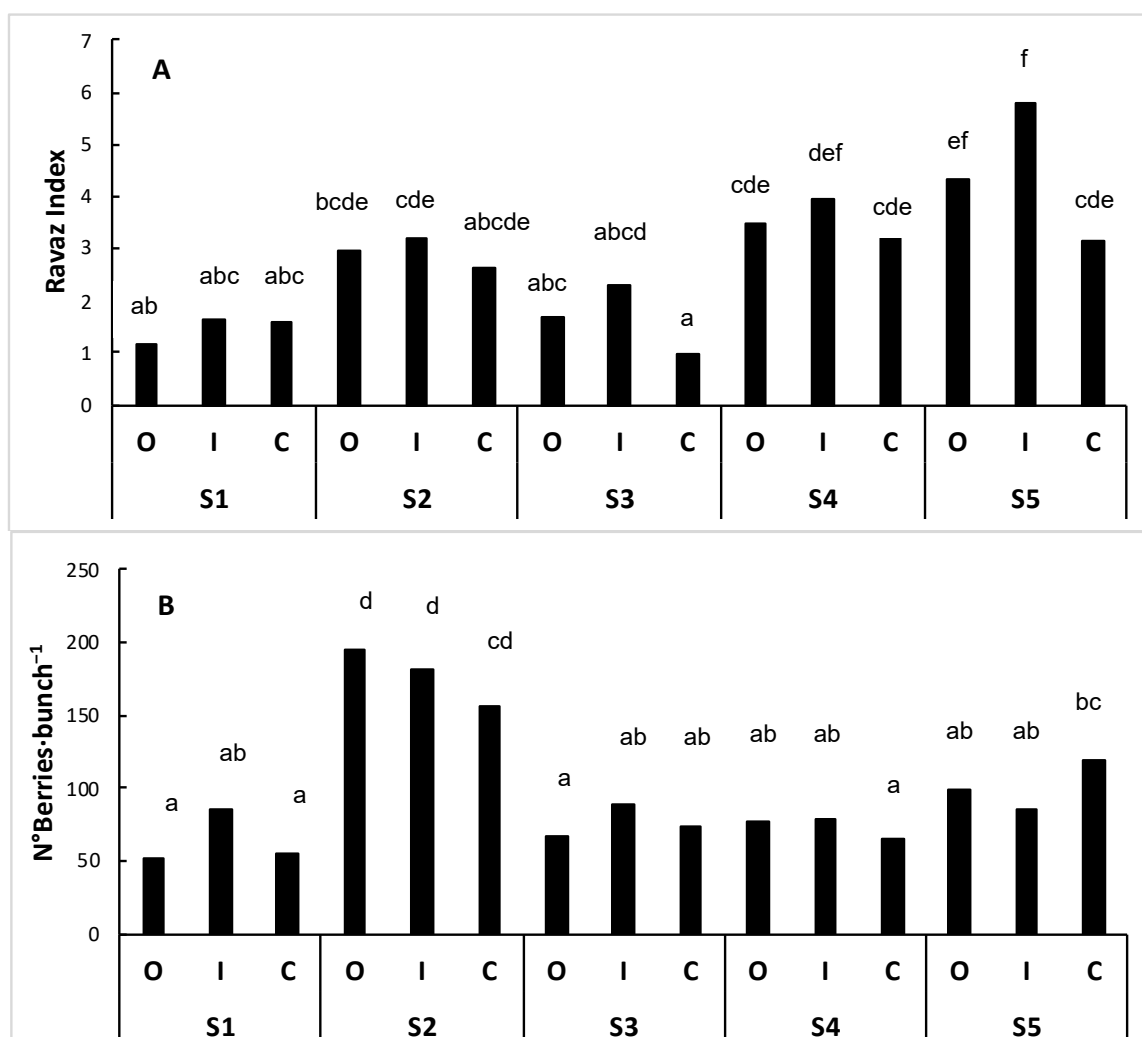

Supplementary Figure S1: Significant interactions of analysis of variance for productive variables (Table 2), Ravaz Index (A) and N° Berries per Bunch (B) according to three management, Organic (O), Integrated (I) and Conventional (C), evaluated during 5 consecutive seasons (S1, S2, S3, S4 and S5).

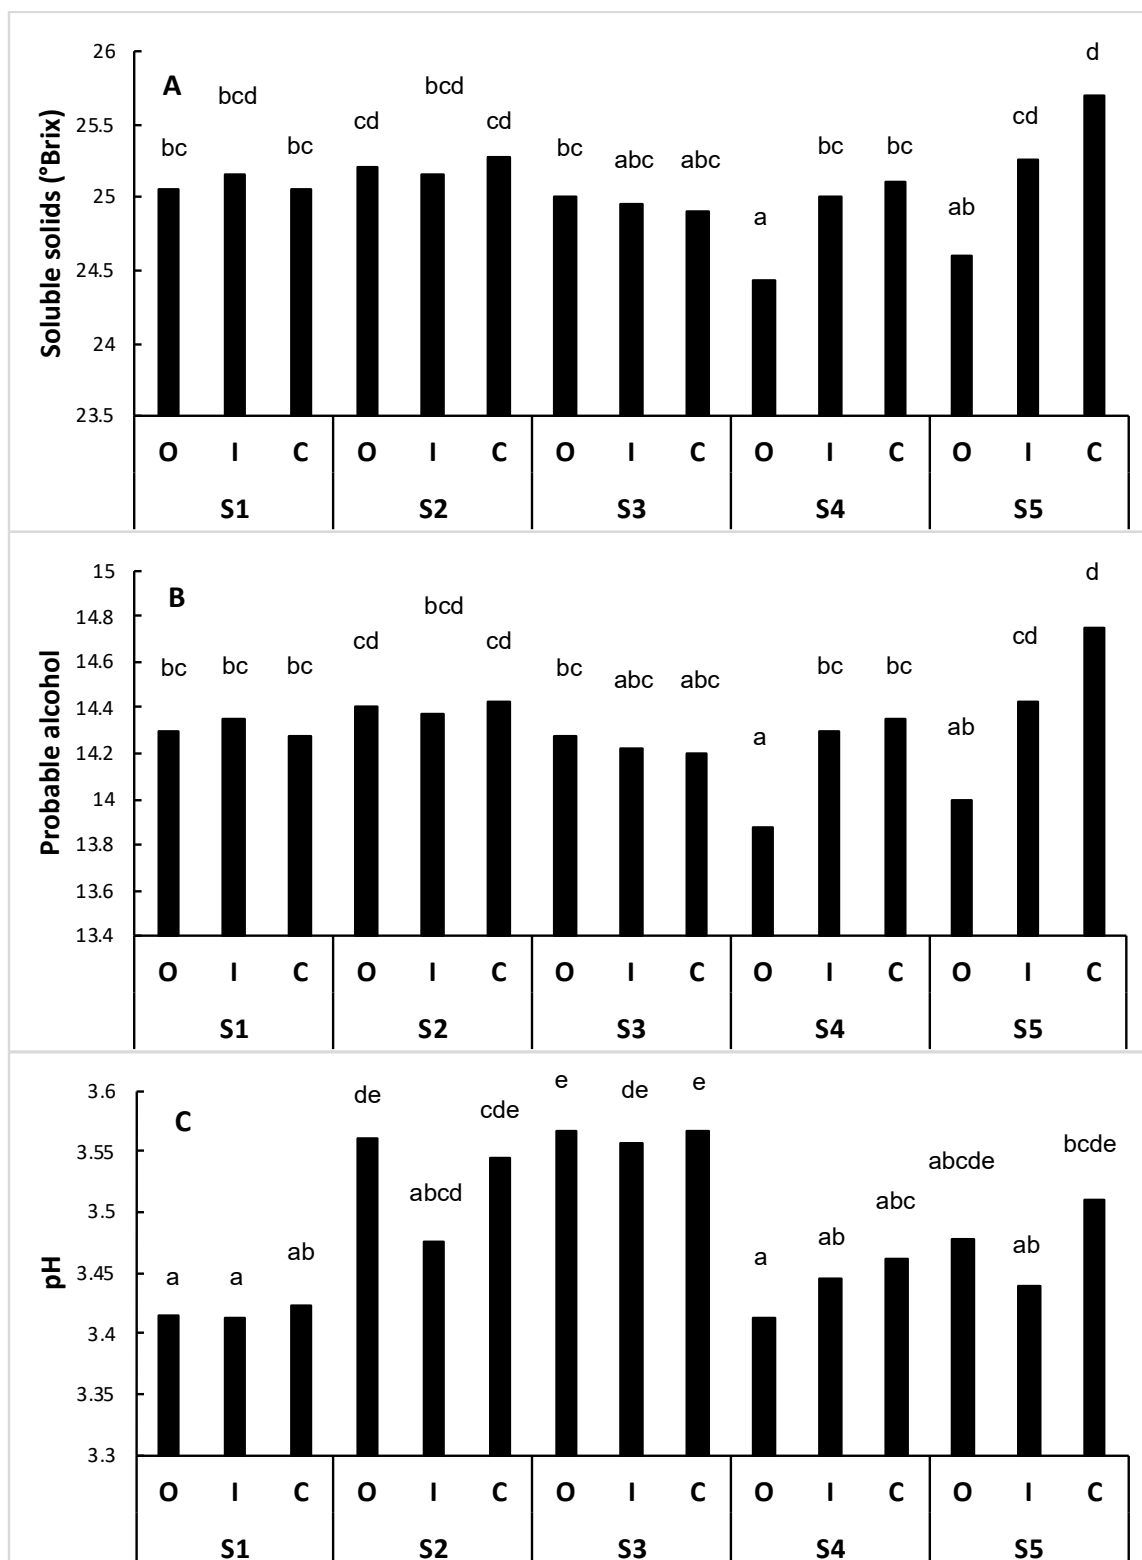

Supplementary Figure S2: Significant interactions of analysis of variance for berry components (Table 3), soluble solids (A), probable alcohol (B), and pH (C) according to three management, Organic (O), Integrated (I) and Conventional (C), evaluated during 5 consecutive seasons (S1, S2, S3, S4 and S5).

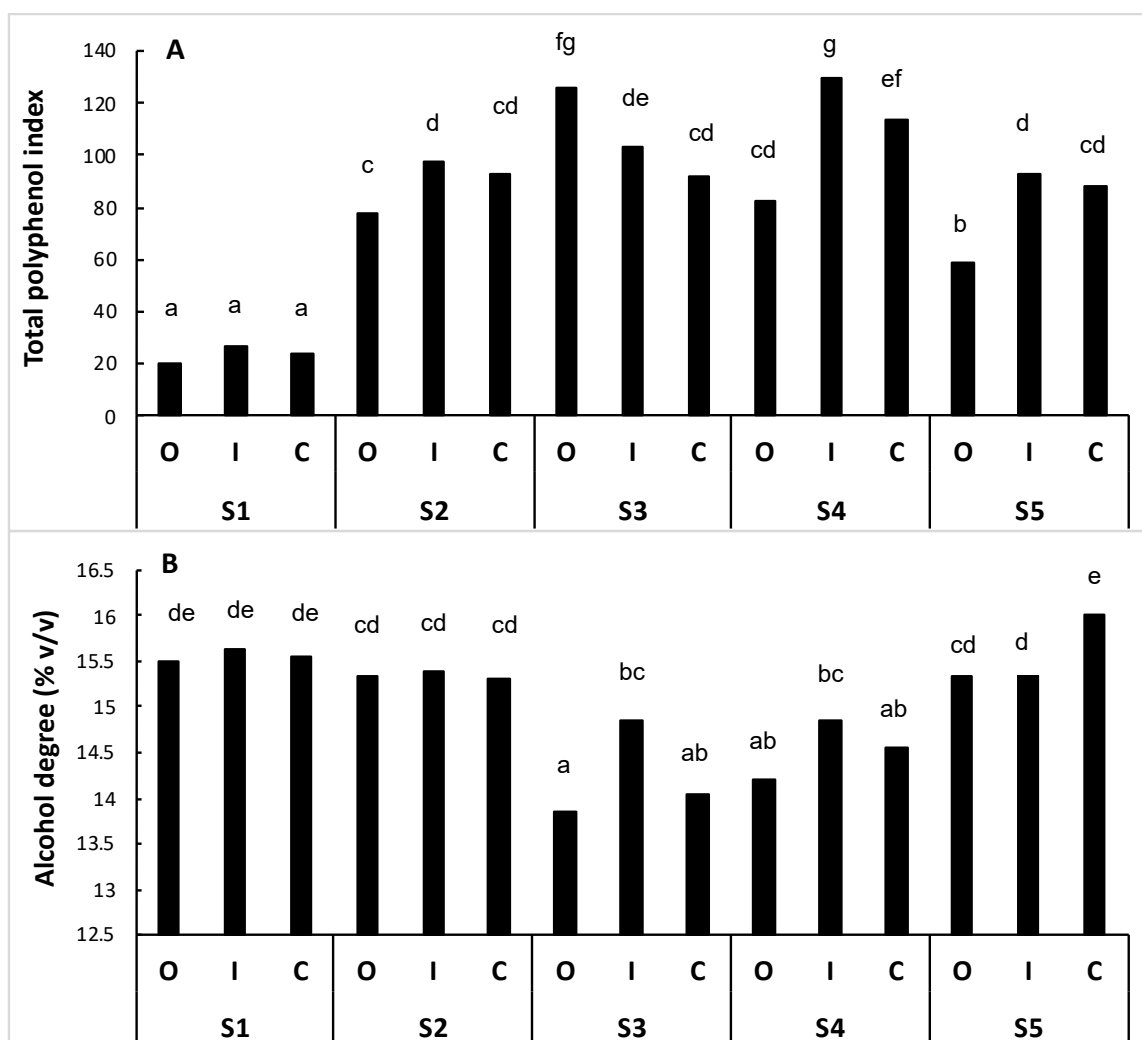

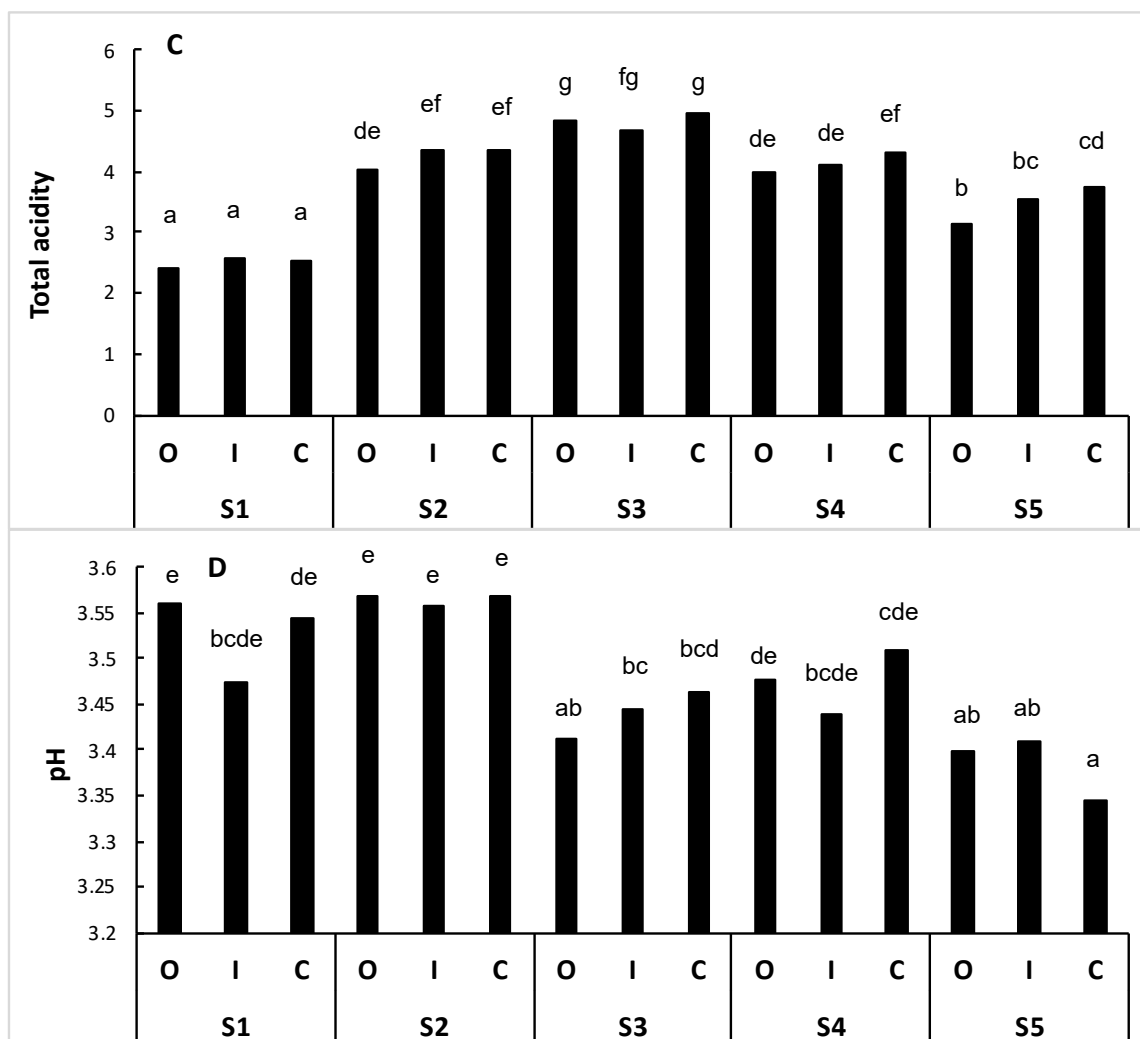

Supplementary Figure S3: Significant interactions of analysis of variance for wine oenological parameters (Table 4), total polyphenol index (A), alcohol degree (B), total acidity (C) and pH (D) according to three management, Organic (O), Integrated (I) and Conventional (C), evaluated during 5 consecutive seasons (S1, S2, S3, S4 and S5).
